# Supplementary material
Source: publisher figshare collection journal article supplement (https://acs.figshare.com/ndownloader/files/4556848)
Supplement: Supplementary file 1 [file 4556848]

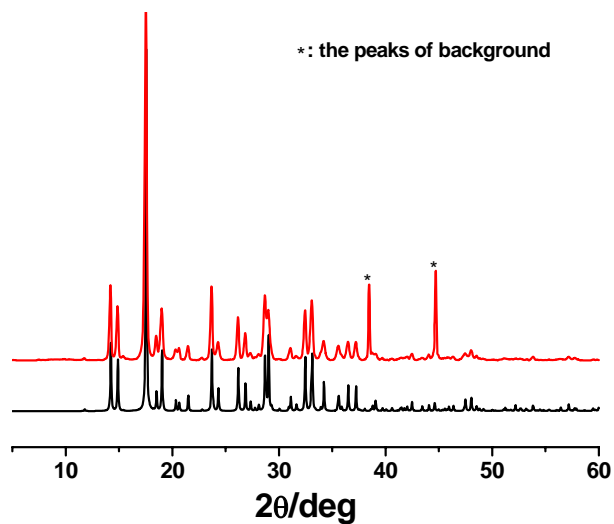

**Figure S1** Simulated (black) & experimental (red) XRPD data for the starting reagent  $H_4L^I$ . The X-ray crystallographic data of  $H_4L^I$  was reported by A. Uchida, M. Hasegawa and H. Manami in *Acta Cryst.* **2003**, C59, o435-o438.

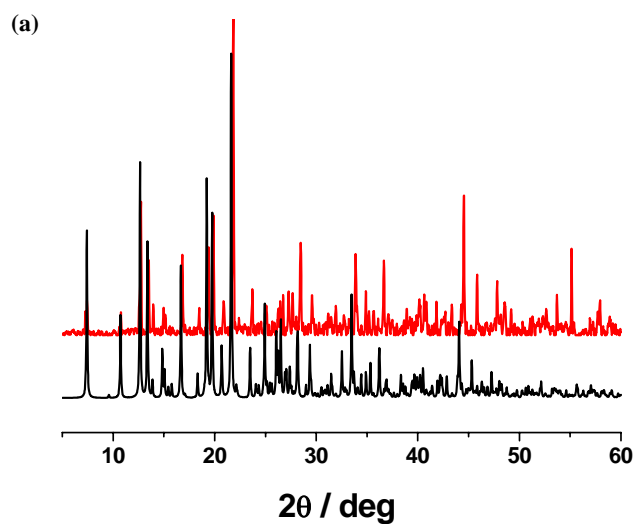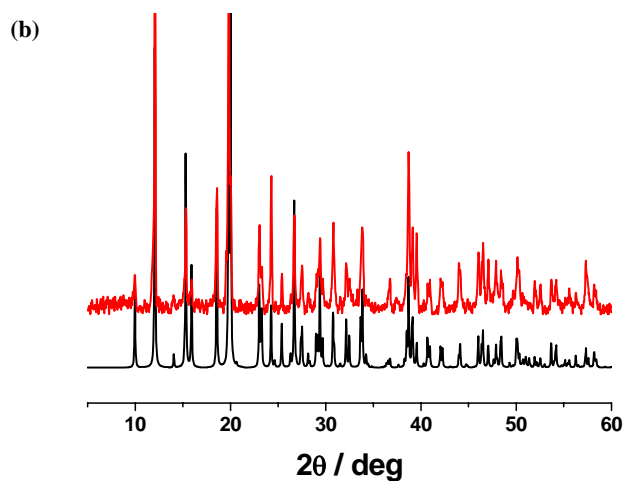

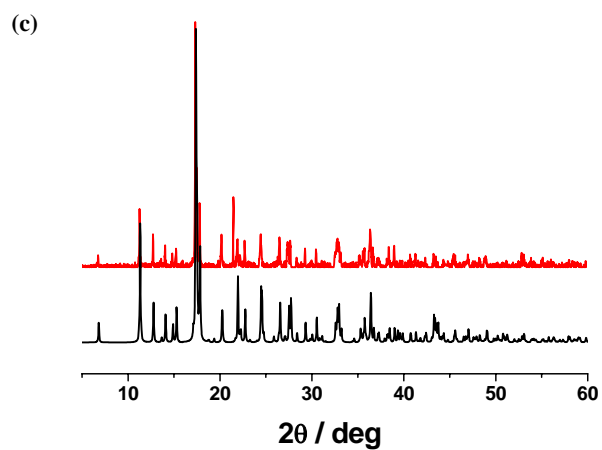

**Figure S2** Simulated (black) & experimental (red) XRPD data for **1** (a), **2** (b) and **3** (c).

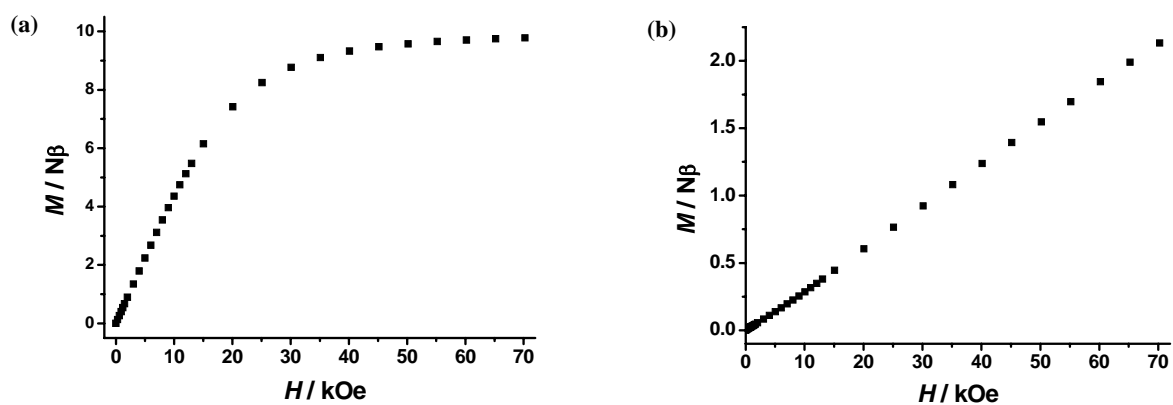

**Figure S3** The magnetization at 2 K for **1** (a) and **2** (b).
